# Supplementary material for: Transcriptomic Analysis Reveals Fibroblast Growth Factor 11 (FGF11) Role in Brown Adipocytes in Thermogenic Regulation of Goats
Source: MDPI journal article supplement (doi:10.3390/ijms241310838), 2023-06-29
Supplement: s1 [file s1]

**Table S2.** Primers used for qPCR.

| Gene symbol     | Sequence 5'-3'                                 | Tm(°C) | Size(bp) |
|-----------------|------------------------------------------------|--------|----------|
| UCP1            | ATCTCAGCGGGCCTAACAAC<br>CTTTCCAAAGCCCCGTCAAG   | 61.4   | 178      |
| PGC1 $\alpha$   | CCACAAATGATGACCCTC<br>GGTTTGGCTTGTAGATGTT      | 59.0   | 103      |
| ELOVL3          | ATGAGGCCCTTTTGGAGGAG<br>CACATCCTCAGTGTCCCGAA   | 61.4   | 182      |
| PPAR $\gamma$   | GTGTCACTCCTGAACGAAAT<br>GGAAATGCTGGAGAAGTCAA   | 61.4   | 156      |
| FASN            | CTGCTCAGTGGGCTCCTCA<br>TGGCGGTCAGTGGCTATGT     | 61.4   | 187      |
| FABP4           | ACTGGGATGGGAAATCAACC<br>CCTTGGCTTATGCTCTCTCG   | 59.0   | 117      |
| CPT1A           | CGTCGCCTTCCAGTTCACAG<br>CACAACCACGATGAGCCAACT  | 61.4   | 181      |
| ACOX1           | CGTAGCCAGCGTTATGAGGT<br>TCCAGGCAGGCATGAAGAAG   | 61.4   | 220      |
| CPT2            | GTGGACTCGGCTGTGTTCT<br>TGCCATCCTTGGCTATAAT     | 61.4   | 142      |
| PFDN5           | AAGACAGCTGAGGATGCCAAG<br>AGGGTTGTGAGCTGCTGAATC | 61.4   | 155      |
| UCP1 promoter 1 | CTGAGCTCGCGCTTGTTT<br>GTCCCGAAGGTGGAAGTT       | 60     | 465      |
| UCP1 promoter 2 | TTCACCACACTGCCATAC<br>GTCCCGAAGGTGGAAGTT       | 60     | 819      |
| UCP1 promoter 3 | CCACATCAGATGGAACCA<br>GTCCCGAAGGTGGAAGTT       | 60     | 1437     |
| UCP1 promoter 4 | CAATACTTTGGCCACCTG<br>GTCCCGAAGGTGGAAGTT       | 60     | 1972     |
| ChIP-qPCR       | CATCGAGGGTAGAGAGTAGA<br>CCTCCGCGGATGACTTATAT   | 61.4   | 159      |
| ND1             | CCGAAAAGGTCCAAACGTCG<br>ATTGAGGATGTGGCAGGTCG   | 61.4   | 105      |
| Nuclear TBP     | CAGTGCAGATTCTGTCCACG<br>CAGTGCAGATTCTGTCCACG   | 61.4   | 118      |
