# Supplementary material for: Transcriptomic Analysis Reveals Fibroblast Growth Factor 11 (FGF11) Role in Brown Adipocytes in Thermogenic Regulation of Goats
Source: MDPI journal article supplement (doi:10.3390/ijms241310838), 2023-06-29
Supplement: s1 [file s1]

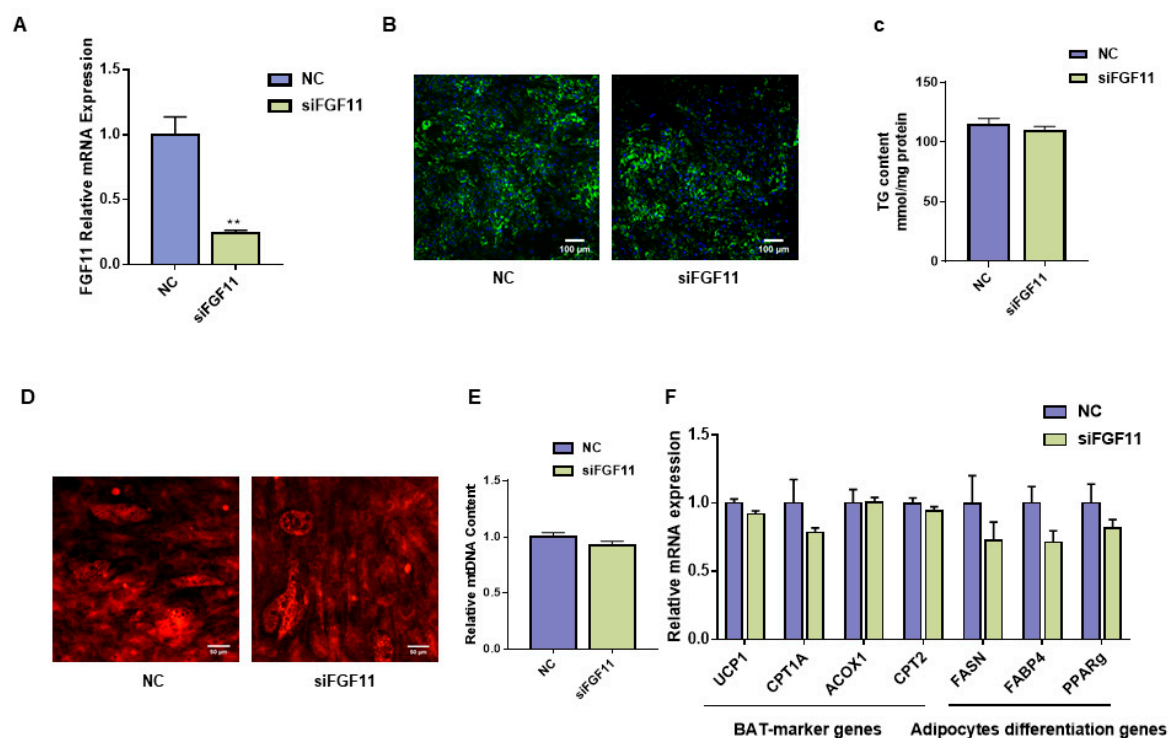

**Figure S1 FGF11 knockdown did not affect white adipocytes thermogenesis.** **A** Interference efficiency after FGF11 knockdown in white adipocytes. **B** Amounts of lipid droplet in white adipocytes after transfection with siFGF11 by BODIPY staining. BODIPY (green), DAPI (blue). Scale bars, 100  $\mu$ m. **C** TG content in brown adipocytes after transfection with siFGF11. **D** Red fluorescence of white adipocytes by Mito-Tracker Red. Scale bars, 50  $\mu$ m. **E** Relative mitochondrial DNA content after transfection with siFGF11 in brown adipocytes. **F** qPCR analysis of related genes expression transfection with siFGF11 in white adipocytes. Error bars represent standard error of mean (SEM),  $n = 6$ , \* $p < 0.05$ , \*\* $p < 0.01$ .
